# Supplementary material
Source: publisher figshare collection journal article supplement (https://rs.figshare.com/ndownloader/files/24316245)
Supplement: Supplementary file 1 [file 24316245]

## Sheet: Metadata
	Dataset S1. Data on tadpole and adult body size
	Genus and family-level taxonomy follows that used in Pyron and Wiens (2013)
	Taxa are listed based on their ordering in the phylogeny
	Tadpole data were only included for individuals that were at or past Gosner stage 32 and at or before Gosner stage 42, if the Gosner stage was reported (otherwise listed as N/A).
	Tadpole data are the maximum size (body + tail) recorded for each species.
	Female adult size is the mean size among adult females for each species
	Sources are given on a separate sheet. Note that references are in alphabetical order.
	Correlated and decoupled evolution of adult and larval body size in frogs
	Tung X. Phung, João C. S. Nascimento, Alexander J. Novarro, John J. Wiens
	Proceedings of the Royal Society of London B, Biological Sciences
	10.1098/rspb

## Sheet: Dataset S1
Species	Family	Gosner Stage	Tadpole size (mm)	Female adult size (mm)	Tadpole/adult size ratio
Hadromophryne natalensis	Heleophrynidae	N/A	85	55	1.54545
Heleophryne purcelli	Heleophrynidae	N/A	60	52	1.16505
Heleophryne regis	Heleophrynidae	N/A	60	46.5	1.29032
Nasikabatrachus sahyadrensis	Nasikabatrachidae	36	52.8	70.1	0.75321
Telmatobufo venustus	Calyptocephalellidae	40	107.4	76	1.41316
Lechriodus fletcheri	Myobatrachidae	41	35	50	0.7
Platyplectrum ornatum	Myobatrachidae	N/A	47	38	1.23684
Philoria sphagnicolus	Myobatrachidae	38	22.7	37	0.613514
Limnodynastes lignarius	Myobatrachidae	N/A	55	46.5	1.1828
Limnodynastes salmini	Myobatrachidae	40	67	70	0.957143
Limnodynastes terraereginae	Myobatrachidae	N/A	70	76	0.921053
Limnodynastes dumerilii	Myobatrachidae	39	90	57	1.57895
Limnodynastes interioris	Myobatrachidae	N/A	70	85	0.823529
Limnodynastes fletcheri	Myobatrachidae	40	69	41	1.68293
Limnodynastes tasmaniensis	Myobatrachidae	N/A	20	42	0.47619
Limnodynastes peronii	Myobatrachidae	40	81	58	1.39655
Adelotus brevis	Myobatrachidae	N/A	30	31.25	0.96
Heleioporus australiacus	Myobatrachidae	N/A	85	100	0.85
Notaden bennettii	Myobatrachidae	41	33.7	45	0.748889
Neobatrachus sudelli	Myobatrachidae	40	77	50	1.54
Neobatrachus pictus	Myobatrachidae	35	78	47	1.65957
Mixophyes fasciolatus	Myobatrachidae	41	84	83	1.01205
Mixophyes balbus	Myobatrachidae	33	79.4	80	0.9925
Paracrinia haswelli	Myobatrachidae	36	55	32	1.71875
Assa darlingtoni	Myobatrachidae	N/A	13.2	19	0.694737
Geocrinia victoriana	Myobatrachidae	38	37.4	33	1.13333
Crinia nimbus	Myobatrachidae	40	21.1	30	0.703333
Crinia signifera	Myobatrachidae	40	36	30	1.2
Crinia tinnula	Myobatrachidae	35	36.7	18	2.03889
Crinia parinsignifera	Myobatrachidae	41	27	23	1.17391
Uperoleia laevigata	Myobatrachidae	40	42	32	1.3125
Pseudophryne bibronii	Myobatrachidae	38	33.5	27	1.24074
Pseudophryne coriacea	Myobatrachidae	41	24	34	0.705882
Hypsiboas cinerascens	Hylidae	34	30.94	43.5	0.711264
Hypsiboas lanciformis	Hylidae	35	45	88.5	0.508475
Hypsiboas joaquini	Hylidae	34	54.4	50.85	1.06981
Hypsiboas leptolineatus	Hylidae	37	45.44	33	1.37697
Hypsiboas polytaenius	Hylidae	37	47.5	50	0.95
Hypsiboas crepitans	Hylidae	36	43.4	61.2	0.70915
Hypsiboas pardalis	Hylidae	35	39.2	70	0.56
Hypsiboas boans	Hylidae	37	43	99	0.434343
Hypsiboas geographicus	Hylidae	33	52	67.5	0.77037
Aplastodiscus cavicola	Hylidae	35	57.2	37.3	1.53351
Aplastodiscus callipygius	Hylidae	39	63.62	47.5	1.33937
Hyloscirtus charazani	Hylidae	36	81.8	70.2	1.16524
Hyloscirtus armatus	Hylidae	37	78.2	74.5	1.04966
Scinax catharinae	Hylidae	37	31.33	42	0.745952
Scinax garbei	Hylidae	36	29	43	0.674419
Scinax boulengeri	Hylidae	38	33.5	47.5	0.705263
Scinax crospedospilus	Hylidae	37	33	33	1
Scinax cruentommus	Hylidae	N/A	30	28.5	1.05263
Scinax fuscovarius	Hylidae	37	54	42.5	1.27059
Scinax ruber	Hylidae	36	24.3	40.5	0.6
Scinax elaeochroa	Hylidae	37	27.8	35	0.794286
Sphaenorhynchus orophilus	Hylidae	39	47	35	1.34286
Pseudis laevis	Hylidae	37	66.4	21.76	3.05147
Pseudis limellum	Hylidae	37	37	25	1.48
Pseudis paradoxa	Hylidae	38	160	60	2.66667
Pseudis bolbodactyla	Hylidae	39	129.6	43.1	3.00696
Pseudis minuta	Hylidae	38	68	42.5	1.6
Pseudis cardosoi	Hylidae	36	87	51	1.70588
Dendropsophus seniculus	Hylidae	37	29.6	37.7	0.785146
Dendropsophus marmoratus	Hylidae	27	25	53	0.471698
Dendropsophus koechlini	Hylidae	N/A	25	26	0.961538
Dendropsophus brevifrons	Hylidae	37	23	21.5	1.06977
Dendropsophus parviceps	Hylidae	27	18.9	23.5	0.804255
Dendropsophus giesleri	Hylidae	33	22.5	31.5	0.714286
Dendropsophus minutus	Hylidae	35	26.2	23	1.13913
Dendropsophus nanus	Hylidae	35	29.5	26.6	1.10902
Dendropsophus bipunctatus	Hylidae	36	29	30.17	0.96122
Dendropsophus rhodopeplus	Hylidae	30	16.2	27.5	0.589091
Dendropsophus microcephalus	Hylidae	41	35	27.9	1.25448
Dendropsophus anceps	Hylidae	36	34.6	44.4	0.779279
Dendropsophus ebraccatus	Hylidae	36	29.4	32.5	0.904615
Dendropsophus sarayacuensis	Hylidae	37	22.5	35.5	0.633803
Dendropsophus triangulum	Hylidae	35	15.2	39	0.389744
Trachycephalus nigromaculatus	Hylidae	37	44.59	90	0.495444
Trachycephalus venulosus	Hylidae	38	49	103.5	0.47343
Trachycephalus resinifictrix	Hylidae	N/A	38.7	88	0.439773
Trachycephalus coriaceus	Hylidae	N/A	38	61.5	0.617886
Osteocephalus cabrerai	Hylidae	38	32.37	71.4	0.453361
Osteocephalus oophagus	Hylidae	40	36.2	53	0.683019
Osteocephalus taurinus	Hylidae	39	38.3	89.5	0.427933
Osteopilus septentrionalis	Hylidae	36	32	108.5	0.294931
Itapotihyla langsdorffii	Hylidae	40	56.3	102.7	0.548199
Isthmohyla pseudopuma	Hylidae	37	30.55	47.6	0.641807
Smilisca baudinii	Hylidae	38	35.5	73	0.486301
Smilisca cyanosticta	Hylidae	36	28.75	65	0.442308
Smilisca phaeota	Hylidae	39	39.8	64	0.621875
Smilisca puma	Hylidae	40	31	43	0.72093
Smilisca fodiens	Hylidae	36	46	63	0.730159
Anotheca spinosa	Hylidae	38	45.3	69	0.656522
Tlalocohyla picta	Hylidae	38	28	21.5	1.30233
Hyla chinensis	Hylidae	N/A	42	40	1.05
Hyla meridionalis	Hylidae	N/A	55	43	1.27907
Hyla arborea	Hylidae	N/A	49	40	1.225
Hyla squirella	Hylidae	N/A	32	33.5	0.955224
Hyla cinerea	Hylidae	N/A	40	57	0.701754
Hyla gratiosa	Hylidae	N/A	50	60.5	0.826446
Hyla arenicolor	Hylidae	37	31	44.5	0.696629
Hyla wrightorum	Hylidae	36	32	40.3	0.794045
Hyla versicolor	Hylidae	36	38	46	0.826087
Hyla avivoca	Hylidae	34	39	42	0.928571
Hyla chrysoscelis	Hylidae	33	21	46	0.456522
Hyla femoralis	Hylidae	N/A	33	34.5	0.956522
Duellmanohyla rufioculis	Hylidae	37	40.9	36.5	1.12055
Duellmanohyla soralia	Hylidae	34	42.7	32.4	1.3179
Acris gryllus	Hylidae	N/A	42.2	24.5	1.72245
Acris crepitans	Hylidae	36	32.5	27	1.2037
Acris blanchardi	Hylidae	36	36	29.2	1.23288
Pseudacris regilla	Hylidae	41	44	36	1.22222
Pseudacris cadaverina	Hylidae	32	37	44.3	0.835214
Pseudacris ornata	Hylidae	36	61	40	1.525
Pseudacris streckeri	Hylidae	N/A	33	48	0.6875
Pseudacris illinoensis	Hylidae	36	65	40	1.625
Pseudacris nigrita	Hylidae	N/A	23	29	0.793103
Pseudacris triseriata	Hylidae	36	62	29.11	2.12985
Pseudacris clarkii	Hylidae	37	34	31	1.09677
Pseudacris brimleyi	Hylidae	33	27	27	1
Pseudacris brachyphona	Hylidae	N/A	25	29.5	0.847458
Pseudacris crucifer	Hylidae	N/A	33	27	1.22222
Pseudacris ocularis	Hylidae	N/A	23	14.75	1.55932
Litoria burrowsi	Hylidae	N/A	80	60	1.33333
Litoria rothii	Hylidae	N/A	100	46	2.17391
Litoria tyleri	Hylidae	39	78	48	1.625
Litoria peronii	Hylidae	41	77	65	1.18462
Litoria dentata	Hylidae	38	41	46.4	0.883621
Litoria rubella	Hylidae	N/A	50	31.5	1.5873
Litoria jervisiensis	Hylidae	39	68	61	1.11475
Litoria verreauxii	Hylidae	40	53	36	1.47222
Litoria revelata	Hylidae	40	58.5	36	1.625
Litoria littlejohni	Hylidae	40	65	59.1	1.09983
Litoria ewingii	Hylidae	40	56	32.5	1.72308
Litoria freycineti	Hylidae	37	53	49	1.08163
Litoria latopalmata	Hylidae	40	49	42.5	1.15294
Litoria watjulumensis	Hylidae	N/A	42	54	0.777778
Litoria nasuta	Hylidae	N/A	61	41.5	1.46988
Litoria fallax	Hylidae	40	42	32	1.3125
Litoria olongburensis	Hylidae	37	37	21.4	1.72897
Litoria arfakiana	Hylidae	38	37	57.4	0.644599
Litoria brevipalmata	Hylidae	39	32	47.4	0.675105
Litoria gracilenta	Hylidae	39	44	44	1
Litoria chloris	Hylidae	41	50	65	0.769231
Litoria caerulea	Hylidae	38	63	103	0.61165
Litoria raniformis	Hylidae	41	94.5	93.9	1.00639
Litoria aurea	Hylidae	N/A	80	93.9	0.85197
Cyclorana novaehollandiae	Hylidae	39	100	101.2	0.988142
Cyclorana australis	Hylidae	N/A	60	85.5	0.701754
Cyclorana alboguttata	Hylidae	40	78	65	1.2
Cyclorana brevipes	Hylidae	41	75	42	1.78571
Cyclorana verrucosa	Hylidae	39	57	48	1.1875
Cyclorana platycephala	Hylidae	39	80	68	1.17647
Litoria lesueurii	Hylidae	40	45	67.5	0.666667
Litoria booroolongensis	Hylidae	41	58	45.7	1.26915
Litoria spenceri	Hylidae	38	37.5	52	0.721154
Litoria citropa	Hylidae	40	34	59.5	0.571429
Litoria pearsoniana	Hylidae	41	32	35.8	0.893855
Litoria phyllochroa	Hylidae	41	33.3	41	0.812195
Litoria subglandulosa	Hylidae	37	46	50.4	0.912698
Cruziohyla calcarifer	Hylidae	37	52.8	72.5	0.728276
Agalychnis callidryas	Hylidae	41	50.5	65.7	0.768645
Agalychnis saltator	Hylidae	34	40.2	54.75	0.734247
Agalychnis annae	Hylidae	39	46.85	69.6	0.673132
Agalychnis spurrelli	Hylidae	36	41.5	76.5	0.542484
Phyllomedusa vaillantii	Hylidae	38	52	78.5	0.66242
Phyllomedusa bicolor	Hylidae	N/A	51	115	0.443478
Phyllomedusa tarsius	Hylidae	36	50	105.5	0.473934
Phyllomedusa distincta	Hylidae	36	46	70	0.657143
Phyllomedusa tetraploidea	Hylidae	37	54.7	58.3	0.93825
Phyllomedusa burmeisteri	Hylidae	35	42	76.7	0.547588
Phyllomedusa itacolomi	Hylidae	37	46.8	44.4	1.05405
Phyllomedusa centralis	Hylidae	33	50.5	42	1.20238
Phyllomedusa rohdei	Hylidae	36	43	39.2	1.09694
Phyllomedusa palliata	Hylidae	37	48	44	1.09091
Phyllomedusa hypochondrialis	Hylidae	37	37	38.5	0.961039
Phyllomedusa tomopterna	Hylidae	38	64	57.5	1.11304
Phasmahyla jandaia	Hylidae	37	42.5	32	1.32812
Phasmahyla exilis	Hylidae	37	39.5	34.5	1.14493
Phasmahyla guttata	Hylidae	37	47.5	45	1.05556
Phasmahyla cochranae	Hylidae	34	48.5	43.5	1.11494
Ceratophrys cornuta	Ceratophryidae	35	56	99.5	0.562814
Ceratophrys ornata	Ceratophryidae	37	70	107.5	0.651163
Chacophrys pierottii	Ceratophryidae	37	81.5	55	1.48182
Macrogenioglottus alipioi	Odontophrynidae	35	67.6	105	0.64381
Odontophrynus carvalhoi	Odontophrynidae	36	48.6	64.9	0.748844
Odontophrynus americanus	Odontophrynidae	37	72.5	44.5	1.62921
Odontophrynus cultripes	Odontophrynidae	37	40	58	0.689655
Odontophrynus moratoi	Odontophrynidae	37	35.4	41.6	0.850962
Proceratophrys concavitympanum	Odontophrynidae	36	47.5	52.37	0.907008
Proceratophrys cururu	Odontophrynidae	38	99	50.45	1.96234
Proceratophrys renalis	Odontophrynidae	38	33.8	55.2	0.612319
Proceratophrys laticeps	Odontophrynidae	36	31	66.5	0.466165
Proceratophrys avelinoi	Odontophrynidae	36	32.6	33.35	0.977511
Telmatobius marmoratus	Telmatobiidae	N/A	110	65	1.69231
Telmatobius vilamensis	Telmatobiidae	35	83.67	48.21	1.73553
Telmatobius vellardi	Telmatobiidae	40	80.6	77.7	1.03732
Telmatobius truebae	Telmatobiidae	35	75.2	82	0.917073
Telmatobius niger	Telmatobiidae	37	86.3	67.7	1.27474
Atelognathus patagonicus	Batrachylidae	N/A	57	50	1.14
Batrachyla leptopus	Batrachylidae	38	28	32.5	0.861538
Rhinoderma darwinii	Rhinodermatidae	39	16.5	28	0.589286
Insuetophrynus acarpicus	Rhinodermatidae	37	61	42.6	1.43192
Thoropa miliaris	Cycloramphidae	40	31	67	0.462687
Cycloramphus boraceiensis	Cycloramphidae	40	26.5	32	0.828125
Crossodactylus schmidti	Hylodidae	34	50.07	28.1	1.78185
Hylodes perplicatus	Hylodidae	36	66.1	45	1.46889
Alsodes gargola	Alsodidae	37	87	50	1.74
Eupsophus vertebralis	Alsodidae	37	26.1	57.6	0.453125
Batrachyla antartandica	Batrachylidae	37	32	37.5	0.853333
Batrachyla taeniata	Batrachylidae	37	36	39	0.923077
Eupsophus calcaratus	Alsodidae	39	23.41	48	0.487708
Eupsophus emiliopugini	Alsodidae	37	23.2	51.25	0.452683
Limnomedusa macroglossa	Alsodidae	37	37	51	0.72549
Melanophryniscus rubriventris	Bufonidae	34	18.2	45	0.404444
Melanophryniscus klappenbachi	Bufonidae	37	15.75	28	0.5625
Melanophryniscus stelzneri	Bufonidae	37	22.4	30	0.746667
Atelopus pulcher	Bufonidae	39	13.8	34.07	0.405048
Atelopus spumarius	Bufonidae	N/A	15	35	0.428571
Atelopus zeteki	Bufonidae	36	12.2	49.5	0.246465
Bufo alvarius	Bufonidae	41	56	132.5	0.422642
Bufo valliceps	Bufonidae	N/A	35	89.5	0.391061
Bufo nebulifer	Bufonidae	36	40	89.5	0.446927
Bufo canorus	Bufonidae	35	29	60	0.483333
Bufo exsul	Bufonidae	34	31	69	0.449275
Bufo boreas	Bufonidae	41	50	92.5	0.540541
Bufo nelsoni	Bufonidae	38	37	92.5	0.4
Bufo quercicus	Bufonidae	N/A	19.4	27	0.718519
Bufo cognatus	Bufonidae	41	25	82	0.304878
Bufo debilis	Bufonidae	36	20	49	0.408163
Bufo speciosus	Bufonidae	34	22	72.5	0.303448
Bufo californicus	Bufonidae	N/A	34	72	0.472222
Bufo fowleri	Bufonidae	35	28	68.5	0.408759
Bufo terrestris	Bufonidae	35	26	68	0.382353
Bufo hemiophrys	Bufonidae	32	29	91	0.318681
Bufo americanus	Bufonidae	36	24	83.5	0.287425
Bufo baxteri	Bufonidae	36	18	61	0.295082
Bufo woodhousii	Bufonidae	33	31	110	0.281818
Bufo veraguensis	Bufonidae	34	23.4	50	0.468
Bufo granulosus	Bufonidae	35	16.6	85	0.195294
Bufo schneideri	Bufonidae	37	35	250	0.14
Bufo marinus	Bufonidae	37	24	149.5	0.160535
Bufo crucifer	Bufonidae	35	19.96	105.2	0.189734
Bufo ictericus	Bufonidae	36	22	162.5	0.135385
Bufo arenarum	Bufonidae	37	30	95	0.315789
Bufo angusticeps	Bufonidae	36	20	58	0.344828
Bufo dombensis	Bufonidae	36	22	40	0.55
Mertensophryne micranotis	Bufonidae	N/A	15	24	0.625
Stephopaedes anotis	Bufonidae	N/A	20	46	0.434783
Capensibufo rosei	Bufonidae	N/A	21	39	0.538462
Capensibufo tradouwi	Bufonidae	N/A	19	35	0.542857
Bufo vertebralis	Bufonidae	N/A	21	36	0.583333
Bufo maculatus	Bufonidae	36	17	60.5	0.280992
Bufo gutturalis	Bufonidae	N/A	25	102.5	0.243902
Bufo calamita	Bufonidae	N/A	25	61	0.409836
Bufo bufo	Bufonidae	N/A	32	100	0.32
Bufo gargarizans	Bufonidae	N/A	24	79	0.303797
Schismaderma carens	Bufonidae	N/A	35	92	0.380435
Bufo viridis	Bufonidae	N/A	44	88	0.5
Pelophryne signata	Bufonidae	40	12.5	17.6	0.710227
Ansonia longidigita	Bufonidae	42	14.8	60	0.246667
Pedostibes hosii	Bufonidae	36	19.5	97.5	0.2
Dendrophryniscus minutus	Bufonidae	40	19.8	20.5	0.965854
Ameerega parvula	Dendrobatidae	37	24.88	22.5	1.10578
Ameerega bilinguis	Dendrobatidae	37	24.83	20.95	1.1852
Hyloxalus sauli	Dendrobatidae	36	24.2	23.5	1.02979
Hyloxalus subpunctatus	Dendrobatidae	36	42.2	24	1.75833
Hyloxalus leucophaeus	Dendrobatidae	40	50.2	24.9	2.01606
Hyloxalus sylvaticus	Dendrobatidae	35	39.3	28.5	1.37895
Hyloxalus azureiventris	Dendrobatidae	37	26.1	28	0.932143
Hyloxalus idiomelus	Dendrobatidae	36	38.5	25.1	1.53386
Hyloxalus elachyhistus	Dendrobatidae	36	38.2	20.4	1.87255
Hyloxalus awa	Dendrobatidae	35	26.1	22.5	1.16
Hyloxalus insulatus	Dendrobatidae	37	31.4	22.8	1.37719
Hyloxalus nexipus	Dendrobatidae	37	30.5	21.4	1.42523
Dendrobates pumilio	Dendrobatidae	35	18	20.5	0.878049
Dendrobates auratus	Dendrobatidae	34	30	34.5	0.869565
Anomaloglossus stepheni	Dendrobatidae	38	13.9	17	0.817647
Anomaloglossus praderioi	Dendrobatidae	39	24.5	22.7	1.0793
Anomaloglossus beebei	Dendrobatidae	37	28.7	17.35	1.65418
Anomaloglossus roraima	Dendrobatidae	41	32	17.9	1.78771
Allobates caeruleodactylus	Dendrobatidae	33	23.32	16.4	1.42195
Hyalinobatrachium aureoguttatum	Centrolenidae	35	38.5	28	1.375
Hyalinobatrachium ibama	Centrolenidae	36	34.6	22.6	1.53097
Centrolene daidaleum	Centrolenidae	36	36.69	25.5	1.43882
Centrolene savagei	Centrolenidae	39	9.8	23.6	0.415254
Centrolene grandisonae	Centrolenidae	36	31.6	27.2	1.16176
Espadarana andina	Centrolenidae	36	39	27.1	1.43911
Teratohyla pulverata	Centrolenidae	34	27.54	32	0.860625
Lithodytes lineatus	Leptodactylidae	N/A	55	52	1.05769
Leptodactylus labyrinthicus	Leptodactylidae	37	54	147.5	0.366102
Leptodactylus pentadactylus	Leptodactylidae	40	83	153	0.542484
Leptodactylus mystacinus	Leptodactylidae	40	40	60.5	0.661157
Leptodactylus spixi	Leptodactylidae	35	25.58	43.6	0.586697
Leptodactylus mystaceus	Leptodactylidae	27	26	56	0.464286
Leptodactylus notoaktites	Leptodactylidae	33	22.3	49.1	0.454175
Leptodactylus elenae	Leptodactylidae	36	24.1	42.8	0.563084
Leptodactylus plaumanni	Leptodactylidae	35	8.67	36.27	0.239041
Leptodactylus gracilis	Leptodactylidae	36	33.8	43	0.786047
Leptodactylus chaquensis	Leptodactylidae	37	44	80.7	0.545229
Leptodactylus discodactylus	Leptodactylidae	30	25	33.5	0.746269
Leptodactylus melanonotus	Leptodactylidae	40	40	45	0.888889
Leptodactylus wagneri	Leptodactylidae	27	34.5	64	0.539062
Leptodactylus rhodomystax	Leptodactylidae	37	50.66	98.5	0.514315
Pseudopaludicola falcipes	Leptodactylidae	37	19.8	14.9	1.32886
Edalorhina perezi	Leptodactylidae	N/A	28	37.5	0.746667
Physalaemus albonotatus	Leptodactylidae	36	24.2	30.2	0.801325
Physalaemus barrioi	Leptodactylidae	37	27.38	29.45	0.929711
Physalaemus biligonigerus	Leptodactylidae	38	32	32.5	0.984615
Paratelmatobius gaigeae	Leptodactylidae	37	24.1	16.7	1.44311
Paratelmatobius poecilogaster	Leptodactylidae	37	25.8	27.65	0.933092
Hemisus marmoratus	Hemisotidae	N/A	55	43	1.27907
Kassina maculata	Hyperoliidae	N/A	130	68.5	1.89781
Semnodactylus wealii	Hyperoliidae	N/A	58	44	1.31818
Kassina senegalensis	Hyperoliidae	N/A	80	37	2.16216
Acanthixalus spinosus	Hyperoliidae	N/A	60	34.1	1.75953
Acanthixalus sonjae	Hyperoliidae	42	47	37	1.27027
Hyperolius semidiscus	Hyperoliidae	N/A	48	35	1.37143
Hyperolius pusillus	Hyperoliidae	N/A	35	22	1.59091
Hyperolius acuticeps	Hyperoliidae	N/A	33	25	1.32
Hyperolius viridiflavus	Hyperoliidae	37	38.4	30	1.28
Hyperolius argus	Hyperoliidae	N/A	48	30.5	1.57377
Hyperolius tuberilinguis	Hyperoliidae	N/A	46	36	1.27778
Alexteroon obstetricans	Hyperoliidae	N/A	29	26	1.11538
Hyperolius kivuensis	Hyperoliidae	37	36.6	36	1.01667
Morerella cyanophthalma	Hyperoliidae	39	40.73	32.3	1.26099
Tachycnemis seychellensis	Hyperoliidae	N/A	44	64	0.6875
Heterixalus betsileo	Hyperoliidae	41	46	24	1.91667
Heterixalus tricolor	Hyperoliidae	39	45	28	1.60714
Afrixalus fornasini	Hyperoliidae	N/A	65	35	1.85714
Afrixalus delicatus	Hyperoliidae	35	14.03	20.7	0.677778
Cardioglossa manengouba	Arthroleptidae	34	30.9	31.2	0.990385
Leptopelis natalensis	Arthroleptidae	N/A	50	65	0.769231
Phrynomantis bifasciatus	Microhylidae	N/A	37	70	0.528571
Phrynomantis annectens	Microhylidae	40	51	37	1.37838
Chiasmocleis shudikarensis	Microhylidae	36	15.6	26.7	0.58427
Chiasmocleis hudsoni	Microhylidae	41	15.3	21.5	0.711628
Hamptophryne boliviana	Microhylidae	27	30	41.5	0.722892
Dermatonotus muelleri	Microhylidae	37	40	53.5	0.747664
Elachistocleis ovalis	Microhylidae	36	20.9	30	0.696667
Gastrophryne olivacea	Microhylidae	41	37	30.5	1.21311
Gastrophryne carolinensis	Microhylidae	36	27.5	28	0.982143
Hypopachus variolosus	Microhylidae	36	22	35	0.628571
Nelsonophryne aequatorialis	Microhylidae	37	39	36.5	1.06849
Hoplophryne rogersi	Microhylidae	N/A	28	29.5	0.949153
Plethodontohyla tuberata	Microhylidae	34	16.5	40	0.4125
Platypelis grandis	Microhylidae	42	20	52	0.384615
Platypelis barbouri	Microhylidae	N/A	16	23	0.695652
Plethodontohyla notosticta	Microhylidae	N/A	17	38.5	0.441558
Cophyla phyllodactyla	Microhylidae	41	14.5	29	0.5
Paradoxophyla tiarano	Microhylidae	38	30.1	29.4	1.02381
Paradoxophyla palmata	Microhylidae	36	26	23.85	1.09015
Scaphiophryne brevis	Microhylidae	33	18.4	46	0.4
Scaphiophryne marmorata	Microhylidae	39	38.1	39.2	0.971939
Scaphiophryne menabensis	Microhylidae	38	31	43.9	0.70615
Scaphiophryne madagascariensis	Microhylidae	38	29.4	56	0.525
Scaphiophryne gottlebei	Microhylidae	38	48.2	40	1.205
Scaphiophryne calcarata	Microhylidae	39	19	30.5	0.622951
Chaperina fusca	Microhylidae	40	21.1	23	0.917391
Microhyla ornata	Microhylidae	39	29.6	28	1.05714
Microhyla fissipes	Microhylidae	41	18.08	22.2	0.814414
Microhyla rubra	Microhylidae	35	29	26.5	1.09434
Calluella guttulata	Microhylidae	34	32.6	118.11	0.276014
Glyphoglossus molossus	Microhylidae	33	39.2	50	0.784
Micryletta inornata	Microhylidae	39	19.1	27.5	0.694545
Uperodon systoma	Microhylidae	N/A	27.25	55	0.495455
Ramanella obscura	Microhylidae	38	27.64	33.5	0.825075
Kaloula taprobanica	Microhylidae	39	33.6	59.4	0.565657
Kaloula pulchra	Microhylidae	37	31	65	0.476923
Dyscophus insularis	Microhylidae	37	35	50	0.7
Kalophrynus pleurostigma	Microhylidae	36	12.1	50	0.242
Otophryne pyburni	Microhylidae	35	19.9	58	0.343103
Phrynobatrachus mababiensis	Phrynobatrachidae	N/A	18	20.5	0.878049
Phrynobatrachus natalensis	Phrynobatrachidae	N/A	35	37.5	0.933333
Conraua goliath	Conrauidae	38	45	245	0.183673
Pyxicephalus adspersus	Pyxicephalidae	N/A	71	215	0.330233
Tomopterna natalensis	Pyxicephalidae	N/A	36	42	0.857143
Tomopterna tandyi	Pyxicephalidae	N/A	41	45	0.911111
Tomopterna cryptotis	Pyxicephalidae	N/A	39	52	0.75
Natalobatrachus bonebergi	Pyxicephalidae	N/A	41	37	1.10811
Strongylopus grayii	Pyxicephalidae	N/A	50	49.5	1.0101
Amietia vertebralis	Pyxicephalidae	40	76.6	38	2.01579
Amietia angolensis	Pyxicephalidae	N/A	80	73	1.09589
Strongylopus fasciatus	Pyxicephalidae	N/A	70	45	1.55556
Cacosternum capense	Pyxicephalidae	N/A	27	96.5	0.279793
Cacosternum platys	Pyxicephalidae	N/A	25	22	1.13636
Microbatrachella capensis	Pyxicephalidae	N/A	25	18	1.38889
Poyntonia paludicola	Pyxicephalidae	N/A	32	26.5	1.20755
Petropedetes martiensseni	Petropedetidae	36	29.6	55	0.538182
Petropedetes newtoni	Petropedetidae	41	26.2	58	0.451724
Petropedetes palmipes	Petropedetidae	N/A	35	46.1	0.759219
Indirana semipalmata	Ranixalidae	37	18.4	30.42	0.604865
Indirana beddomii	Ranixalidae	40	26.4	40.2	0.656716
Occidozyga baluensis	Dicroglossidae	41	26.3	35	0.751429
Occidozyga laevis	Dicroglossidae	40	23	39	0.589744
Fejervarya cancrivora	Dicroglossidae	38	38	80	0.475
Fejervarya triora	Dicroglossidae	37	31	58.1	0.533563
Hoplobatrachus tigerinus	Dicroglossidae	38	50	137.5	0.363636
Euphlyctis hexadactylus	Dicroglossidae	37	35	130	0.269231
Euphlyctis cyanophlyctis	Dicroglossidae	40	71	58.75	1.20851
Limnonectes malesianus	Dicroglossidae	39	22.9	85	0.269412
Limnonectes finchi	Dicroglossidae	38	23	42	0.547619
Limnonectes ingeri	Dicroglossidae	39	27.9	127	0.219685
Limnonectes blythii	Dicroglossidae	37	36	152.5	0.236066
Limnonectes ibanorum	Dicroglossidae	36	36	102.8	0.350195
Limnonectes palavanensis	Dicroglossidae	36	22.9	34.4	0.665698
Limnonectes microdiscus	Dicroglossidae	40	37	27	1.37037
Limnonectes limborgi	Dicroglossidae	37	15	30.18	0.497018
Paa fasciculispina	Dicroglossidae	37	71.88	104	0.691154
Buergeria japonica	Rhacophoridae	32	30	32	0.9375
Chiromantis vittatus	Rhacophoridae	38	33	32	1.03125
Chiromantis xerampelina	Rhacophoridae	N/A	55	75	0.733333
Polypedates maculatus	Rhacophoridae	38	50	80.5	0.621118
Polypedates colletti	Rhacophoridae	37	26.3	62	0.424194
Rhacophorus maximus	Rhacophoridae	35	35.2	110	0.32
Rhacophorus omeimontis	Rhacophoridae	N/A	47.7	79.5	0.6
Rhacophorus minimus	Rhacophoridae	35	22.5	38.3	0.587467
Rhacophorus dugritei	Rhacophoridae	N/A	32	51	0.627451
Rhacophorus chenfui	Rhacophoridae	N/A	35	55	0.636364
Rhacophorus annamensis	Rhacophoridae	41	43.27	86.8	0.498502
Kurixalus idiootocus	Rhacophoridae	41	29.8	45	0.662222
Aglyptodactylus laticeps	Mantellidae	38	36.6	60.4	0.60596
Aglyptodactylus madagascariensis	Mantellidae	35	25.75	50.9	0.505894
Laliostoma labrosum	Mantellidae	38	44	57	0.77193
Boophis madagascariensis	Mantellidae	40	60	70	0.857143
Boophis luteus	Mantellidae	37	65	47.5	1.36842
Boophis albilabris	Mantellidae	41	44.3	74.5	0.594631
Boophis viridis	Mantellidae	36	30.5	33.5	0.910448
Boophis marojezensis	Mantellidae	41	26.5	32.4	0.817901
Boophis xerophilus	Mantellidae	39	37.2	41.3	0.900726
Boophis doulioti	Mantellidae	39	39.4	48.3	0.815735
Guibemantis liber	Mantellidae	37	35	27.5	1.27273
Guibemantis depressiceps	Mantellidae	38	42	35	1.2
Guibemantis tornieri	Mantellidae	36	40	48.5	0.824742
Mantella bernhardi	Mantellidae	38	27.1	20.5	1.32195
Mantella laevigata	Mantellidae	35	25	25.5	0.980392
Mantella viridis	Mantellidae	33	20.6	28.5	0.722807
Mantella expectata	Mantellidae	37	28.6	26	1.1
Mantella aurantiaca	Mantellidae	38	20.1	25	0.804
Mantella crocea	Mantellidae	38	20.7	23.5	0.880851
Mantella pulchra	Mantellidae	33	21.8	23	0.947826
Gephyromantis ambohitra	Mantellidae	37	26.6	35.2	0.755682
Gephyromantis pseudoasper	Mantellidae	34	34	33	1.0303
Mantidactylus ulcerosus	Mantellidae	34	34	39.5	0.860759
Mantidactylus lugubris	Mantellidae	36	37.5	50	0.75
Spinomantis elegans	Mantellidae	35	106	60	1.76667
Rana curtipes	Ranidae	N/A	94	74	1.27027
Huia cavitympanum	Ranidae	39	68.5	74	0.925676
Amolops hainanensis	Ranidae	N/A	50	73	0.684932
Amolops bellulus	Ranidae	36	63.3	63.6	0.995283
Rana perezi	Ranidae	N/A	65	97.5	0.666667
Rana nigrovittata	Ranidae	37	27.69	45.3	0.611258
Amnirana albolabris	Ranidae	N/A	60	66	0.909091
Amnirana galamensis	Ranidae	N/A	60	74	0.810811
Rana erythraea	Ranidae	38	54.3	68	0.798529
Rana rugosa	Ranidae	33	48	52.5	0.914286
Odorrana schmackeri	Ranidae	N/A	45	80	0.5625
Rana hosii	Ranidae	N/A	38	92.5	0.410811
Rana supranarina	Ranidae	N/A	50	92.5	0.540541
Odorrana jingdongensis	Ranidae	39	34	36.15	0.940526
Rana pretiosa	Ranidae	41	75	76.5	0.980392
Rana luteiventris	Ranidae	N/A	90	60	1.5
Rana boylii	Ranidae	41	50	57	0.877193
Rana aurora	Ranidae	41	75	93.5	0.802139
Rana cascadae	Ranidae	N/A	70	52.5	1.33333
Rana muscosa	Ranidae	41	50	62.5	0.8
Rana graeca	Ranidae	N/A	48	75	0.64
Rana dalmatina	Ranidae	N/A	59	70	0.842857
Rana iberica	Ranidae	N/A	44	47	0.93617
Rana temporaria	Ranidae	N/A	45	65	0.692308
Rana pyrenaica	Ranidae	38	36.8	45	0.817778
Rana amurensis	Ranidae	N/A	32	66.5	0.481203
Rana arvalis	Ranidae	N/A	43	75	0.573333
Rana pirica	Ranidae	N/A	45	63	0.714286
Rana warszewitschii	Ranidae	N/A	115	55.5	2.07207
Rana palmipes	Ranidae	35	92	102	0.901961
Rana tarahumarae	Ranidae	41	100	67	1.49254
Rana onca	Ranidae	36	45	74	0.608108
Rana yavapaiensis	Ranidae	39	115	76.4	1.50524
Rana blairi	Ranidae	35	72	59.3	1.21417
Rana sphenocephala	Ranidae	N/A	62.5	89	0.702247
Rana pipiens	Ranidae	41	87	89.5	0.972067
Rana chiricahuensis	Ranidae	33	51	80	0.6375
Rana capito	Ranidae	35	62	75.5	0.821192
Rana sevosa	Ranidae	32	52	92.5	0.562162
Rana areolata	Ranidae	37	58	108	0.537037
Rana palustris	Ranidae	N/A	75.8	66	1.14848
Rana catesbeiana	Ranidae	41	162	155	1.04516
Rana grylio	Ranidae	N/A	100	123	0.813008
Rana septentrionalis	Ranidae	33	67	63.25	1.05929
Rana virgatipes	Ranidae	34	72	66	1.09091
Rana heckscheri	Ranidae	32	108	128.5	0.840467
Rana clamitans	Ranidae	36	87	72	1.20833
Rana okaloosae	Ranidae	36	43	48.8	0.881148
Rana sylvatica	Ranidae	41	50	59	0.847458
Lankanectes corrugatus	Nyctibatrachidae	36	39.04	71	0.549859
Hildebrandtia ornata	Ptychadenidae	N/A	95	67.3	1.41159
Ptychadena anchietae	Ptychadenidae	N/A	45	57	0.789474
Ptychadena tellinii	Ptychadenidae	40	47	41.5	1.13253
Ptychadena porosissima	Ptychadenidae	N/A	41	44	0.931818
Scaphiopus couchii	Scaphiopodidae	41	31	69.5	0.446043
Scaphiopus holbrookii	Scaphiopodidae	N/A	28	63.5	0.440945
Spea multiplicata	Scaphiopodidae	38	34.2	51	0.670588
Spea intermontana	Scaphiopodidae	41	70	58.5	1.19658
Spea bombifrons	Scaphiopodidae	41	68	47.5	1.43158
Spea hammondii	Scaphiopodidae	38	71	50.5	1.40594
Pelobates fuscus	Pelobatidae	N/A	180	53.89	3.34014
Pelobates varaldii	Pelobatidae	N/A	130	62.5	2.08
Pelobates cultripes	Pelobatidae	37	70.67	77	0.917792
Leptolalax oshanensis	Megophryidae	32	53.7	27	1.98889
Leptolalax pelodytoides	Megophryidae	35	50.8	42	1.20952
Scutiger glandulatus	Megophryidae	38	62	81	0.765432
Scutiger mammatus	Megophryidae	34	46.5	75	0.62
Scutiger boulengeri	Megophryidae	38	60.8	67.7	0.89808
Oreolalax rhodostigmatus	Megophryidae	32	106.3	66.5	1.5985
Oreolalax lichuanensis	Megophryidae	N/A	72	59	1.22034
Oreolalax schmidti	Megophryidae	36	48.7	51	0.954902
Oreolalax pingii	Megophryidae	N/A	64	52	1.23077
Oreolalax popei	Megophryidae	38	79.5	59.25	1.34177
Oreolalax rugosus	Megophryidae	34	53.2	50.15	1.06082
Oreolalax major	Megophryidae	36	66.7	67.5	0.988148
Leptobrachium liui	Megophryidae	36	88.2	71.3	1.23703
Leptobrachium chapaense	Megophryidae	38	74.9	71.6	1.04609
Leptobrachium ailaonicum	Megophryidae	37	104.1	81.6	1.27574
Leptobrachium boringii	Megophryidae	N/A	117	67.3	1.73848
Leptobrachium hainanense	Megophryidae	36	67.3	49.5	1.3596
Ophryophryne microstoma	Megophryidae	37	33.2	55	0.603636
Brachytarsophrys platyparietus	Megophryidae	39	49.9	131	0.380916
Megophrys nasuta	Megophryidae	41	42.2	107.5	0.392558
Pelodytes punctatus	Pelodytidae	37	38.33	42.5	0.901882
Rhinophrynus dorsalis	Rhinophrynidae	38	45	74	0.608108
Hymenochirus boettgeri	Pipidae	39	21	35	0.6
Xenopus muelleri	Pipidae	N/A	70	58	1.2069
Xenopus laevis	Pipidae	41	37	100	0.37
Discoglossus galganoi	Alytidae	N/A	35	56.5	0.619469
Discoglossus pictus	Alytidae	41	40	56.5	0.707965
Alytes cisternasii	Alytidae	N/A	70	34.9	2.00573
Alytes muletensis	Alytidae	N/A	76	33.35	2.27886
Bombina variegata	Bombinatoridae	40	52	44.6	1.16592
Leiopelma hochstetteri	Leiopelmatidae	35	20.77	43.5	0.477471
Leiopelma archeyi	Leiopelmatidae	35	20.4	35.5	0.574648
Ascaphus truei	Ascaphidae	42	58	45.5	1.27473
Ascaphus montanus	Ascaphidae	N/A	64	43.5	1.47126

## Sheet: Sources
Literature Sources for Size Data
Alford, R.A. 1986. Habitat use and positional behavior of anuran larvae in a Northern Florida temporary pond. Copeia 1986: 408-423.
AmphibiaWeb: Information on amphibian biology and conservation. [web application]. 2012. Berkeley, CA: AmphibiaWeb. Available: http://amphibiaweb.org/.
Anderson, J. 1895. Reptiles and batrachians from Aden. Proc. Zool. Soc. London: 600.
Annandale, N. 1918. The tadpoles of the families Ranidae and Bufonidae found in the plains of India. Records of the Indian Museum 15: 25-40.
Audo, M.C., T.M. Mann, T.L. Polk, C.M. Loudenslager, W.J. Diehl, and R. Atlig. 1995. Food deprivation during different periods of tadpole (Hyla chrysoscelis) ontogeny affects metamorphic performance differently. Oecologia 103: 518-522.
Barandun, J. and H.U. Reyer. 1997. Reproductive ecology of Bombina variegata: development of eggs and larvae. Journal of Herpetology 31: 107-110.
Barbadillo, L.J., Lacomba, J.I., Pérez Mellado, V., Sancho, V. and López-Jurado, L.F. 1999. Anfibios y reptiles de la Península Ibérica, Baleares y Canarias. GeoPlaneta S.A. Barcelona. 419 pp.
Bell, B.D. and R.J. Wassersug. 2003. Anatomical features of Leiopelma embryos and larvae: Implications for anuran evolution. Journal of Morphology 256: 160-170.
Berry, P.Y. 1972. Undescribed and little known tadpoles from West Malaysia. Herpetologica 28: 338-346.
Boulenger, G.A. 1892. A synopsis of the tadpoles of European batrachians. Proc. Zool. Soc. London 1891: 593-627, plates 45-47.
Bowatte, G. and M. Meegaskumbura. 2011. Morphology and ecology of tadpoles of Ramanella obscura (Anura: Microhylidae). Ceylon Journal of Science 40: 109-120.
Briggs, V.S. 2007. Sexual selection and larval performance of two species of red-eyed treefrogs, Agalychnis callidryas and A. moreletii of the Chiquibul Forest Reserve, Belize." Open Access Dissertations. Paper 3. Available at: http://scholarlyrepository.miami.edu/oa_dissertations/3
Bruce, H.M. and A.S. Parkes. 1947. Observations on Discoglossus pictus Otth. Proceedings of the Royal Society of London 134: 37-52.
Busack, S.D. and G.R. Zug. 1976. Observations on the tadpoles of Pelobates cultripes from Southern Spain. Herpetologica 32: 130-137.
Cabrera-Guzmán, E., M.R. Crossland, and R. Shine. 2012. Predation on the eggs and larvae of invasive cane toads (Rhinella marina) by native aquatic invertebrates in tropical Australia. Biological Conservation 153: 1-9.
Campbell, J.A. and B.T. Clarke. 1998. A review of the genus Otophryne (Microhylidae) with the description of a new species. Herpetologica 54: 301-317.
Carr, J.A., A. Gentles, E.E. Smith, W.L. Goleman, L.J. Urquidi, K. Thuett, R.J. Kendall, J.P. Giesy, T.S. Gross, K.R. Solomon, and G. Kraak. 2002. Response of larval Xenopus laevis to altrazine: assessment of growth, metamorphosis, and gonadal and laryngeal morphology. Enironmental Toxicology and Chemistry 22: 396-405.
Cei, J.M. 1980. Amphibians of Argentina. Italian Journal of Zoology: 1-605.
Chanard, T., J. Nabhitabhata, and K. Suwannapakdi. 2007. On the definite occurrence of Brachytarsophrys feae. The Thailand Natural History Museum Journal 2: 27-30.
Channing, A. 2001. Amphibians of Central and Southern Africa. Comstock Books in Herpetology, Ithaca, New York.
Channing, A. and M. Vences. 1999. The advertisement call, breeding biology, description of the tadpole and taxonomic status of Bufo dombensis, a little0known dwarf toad from southern Africa. S. Afr. J. Zool. 34: 74-79.
Channing, A. and K. Howell. 2006. Amphibians of East Africa. Comstock Books in Herpetology, Ithaca, New York.
Coloma, L.A. 1995. Ecuadorian frogs of the genus Colostethus (Anura: Dendrobatidae). Miscellaneous Publication of The University of Kansas Natural History Museum 87:1-75.
Conant, R. and J.T. Collins. 1991. A Field Guide to Reptiles and Amphibians: Eastern and Central North America. Third Edition. Houghton Mifflin Company, New York, NY.
Crossland, M.R. and C. Azevedo-Ramos. 1999. Effects of Bufo (Anura: Bufonidae) toxins on tadpoles from native and exotic Bufo habitats. Herpetologica 55: 192-199.
Crump, M.L. 1984. Ontogenetic changes in vulnerability to predation in tadpoles of Hyla pseudopuma. Herpetologica 40: 265-271.
Daniel, J.C. 2002. The book of Indian reptiles and amphibians. Oxford University Press, Oxford.
d’Heursel, A. and C.F.B. Haddad. 2007. Anatomy of the oral cavity of Hylid larvae from the genera Aplastodiscus, Bokermannohyla, and Hypsiboas (Amphibia, Anura): description and systematic implications. Journal of Herpetology 41: 458-468.
Diaz, N., M. Sallaberry, and H. Nuñez. 1983. The tadpole of Tematobufo venustus (Anura: Leptodactylidae) with a consideration of generic relationships. Herpetologica 39: 111-113.
Donnelly, M.A., C. Guyer, D.M. Krempels, and H.A. Braker. 1987. The tadpole of Agalychnis calcarifer (Anura: Hylidae). Copeia 1987 (1): 247-250.
Downie, J.R., P.T. Walsh, and C. Langhorne. 2008. Asymmetric larval competition between two species of neotropical foam-nesting frogs: Leptodactylus fuscus and Engystomops pustulosus. Journal of Natural History 42: 2151-2159.
Drewes, R.C., R. Altig, and K.M. Howell. 1989. Tadpoles of three frog species endemic to the forests of the Eastern Arc Mountains, Tanzania. Amphibia-Reptilia 10: 435-443.
Du Preez, L.H. and V. Carruthers. 2009. A complete guide to the frogs of southern Africa. Struik Nature, Cape Town, South Africa.
Dubois, A. and A. Ohler. 1998. A new species of Leptobrachium (Vibrissaphora) from northern Vietnam, with a review of the taxonomy of the genus Leptobrachium (Pelobatidae, Megophryinae). Dumerilla 4: 1-32.
Duellman, W.E. 1969. A new species of frog in the Hyla parviceps group from Ecuador. Herpetologica 25: 241-247.
Duellman, W.E. 1970. The Hylid Frogs of Middle America Volume 1. Monogr. Mus. Nat. Hist. Univ. Kansas.
Duellman, W.E. 1978. The biology of an equatorial herpetofauna in Amazonian Ecuador. Miscellaneous Publications of the University of Kansas Museum of Natural History 65: 1-376.
Duellman, W.E. and J.B. Tulecke. 1960. The distribution, variation, and life history of the frog Cochranella viridissima in Mexico. American Midland Naturalist 63: 392-397.
Duellman, W.E. and J.D. Lynch. 1969. Descriptions of Atelopus tadpoles and their relevance to atelopodid classification. Herpetologica 25: 231-240.
Duellman, W.E., J.E. Cadle, and D.C. Cannatella. 1988. A new species of terrestrial Phyllomedusa (Anura: Hylidae) from Southern Peru). Herpetologica 44: 91-95.
Edwards, S.R. 1974. Taxonomic notes on South American Dendrobatid frogs of the genus Colostethus. Occasional Papers of the Museum of Natural History 30: 1-14.
Fabrezi, M., S.I. Quinzio, and J. Goldberg. 2009. Giant tadpole and delayed metamorphosis of Pseudis platensis Gallardo, 1961 (Anura, Hylidae). Journal of Herpetology 43: 228-243.
Fei, L. 1999. Atlas of amphibians of China. Henan Science and Technology Press, Zhengzhou.
Formas, J.R. 1989. The tadpole of Eupsophus calcaratus in Southern Chile. The Journal of Herpetology 23: 195-197.
Gawor, A., R. Hendrix, M. Vences, W. Bohme, and T. Ziegler. 2009. Larval morphology in four species of Hylarana from Vietnam and Thailand with comments on the taxonomy of H. nigrovittata sensu latu (Anura: Ranidae). Zootaxa 2051: 1-25.
Gerlach, J. and R. Gerlach. 2010. Reproduction in the tree frog Tachycnemis seychellensis. Phelsuma 18: 82-89.
Gillespie, G.R. 2002. Impacts of sediment loads, tadpole density, and food type on the growth and development of tadpoles of the spotted tree frog Litoria spenceri: an in-stream experiment. Biological Conservation 106: 141-150.
Glaw, F. and M. Vences. 1994. A Field Guide to the Amphibians and Reptiles of Madagascar. Second Edition. Serpent’s Tail, London, UK.
Glos, J. and E. Linsenmair. 2004. Descriptions of the tadpoles of Aglyptodactylus laticeps and Aglyptodactylus securifer from Western Madagascar, with notes on life history and ecology. Journal of Herpetology 38: 131-136.
Glos, J. and E. Linsenmair. 2005. Description of the tadpoles of Boophis doulioti and B. xerophilus from Western Madagascar with notes on larval life history and breeding ecology. Amphibia-Reptilia 26: 459-466.
Glos, J., F. Glaw, and M. Vences. 2005. A new species of Scaphiophryne from Western Madagascar. Copeia 2: 252-261.
Green, N.B. 1938. The breeding habits of Pseudacris brachyphona (Cope) with a description of the eggs and tadpole. Copeia 2: 79-82.
Grosjean, S. 2001. The tadpole of Leptobrachium (Vibrissaphora) echinatum (Amphibia, Anura, Megophryidae). Zoosystema 23: 143-156.
Grosjean, S. 2005. The choice of external morphological characters and developmental stages for tadpole-based anuran taxonomy: a case study in Rana (Sylvirana) nigrovittata (Blyth, 1855) (Amphibia, Anura, Ranidae). Contributions to Zoology 74: 61-76.
Grosjean, S. and M. Vences. 2009. The tadpole of the toadlet Scaphiophryne marmorata from Madagascar. Zootaxa 1968: 67-68.
Grosjean, S., M. Vences, and A. Dubois. 2004. Evolutionary significance of oral morphology in the carnivorous tadpoles of tiger frogs, genus Hoplobatrachus (Ranidae). Biological Journal of the Linnean Society 81: 171-181.
Hendrix, R., S. Grosjean, L.K. Quyet, M. Vences, V.N. Thanh, and T. Ziegler. 2007. Molecular identification and description of the tadpole of the Annam flying frog, Rychophorus annamensis Smith, 1924 (Anura: Rhacophoridae). Salamandra 43: 11-19.
Heyer, W.R. 1971. Descriptions of some tadpoles from Thailand. Fieldiana (Zool.) 58: 83-91.
Heyer, W.R., A.S. Rand, C.A.G. da Cruz, O.L. Peixoto, and C.E. Nelson. 1990. Frogs of Boracéia. Arquivos de Zoologia 31 (4): 235-410.
Heyer, W.R., R.W. McDiarmid, nad D.L. Weigmann. 1975. Tadpoles, predation and pond habitats in the tropics. Biotropica 7: 100-111.
Hillis, D.M. 1982. Morphological differentiation and adaptation of the larvae of Rana berlandieri and Rana sphenocephala (Rana pipiens complex) in sympatry. Copeia 1: 168-174.
Hopkins, S. 2006. The ecology of tadpoles in a temporary pond in the Western Cape with comparisons to other habitats. [Unpublished data]. Aailable at: http://etd.uwc.ac.za/usrfiles/modules/etd/docs/etd_gen8Srv25Nme4_7300_1210838007.pdf.
Inger, R.F. 1985. Tadpoles of the forested regions of Borneo. Zoology 26: 1-89.
Ingram, G.T., M. Anstis, and C.J. Corben. 1975. Observations on the Australian Leptodactylid frog, Assa darlingtoni. Herpetologica 31: 425-429.
Khan, M.S. 2001. Notes of cranial-ridged toads of Pakistan and description of a new subspecies (Amphiba: Bufonidae). Pakistan J. Zool 33: 293-298.
Kokubum, M.N.C. and A.A. Giaretta. 2005. Reproductive ecology and behavior of a species of Adenomera (Anura, Leptodactylinae) with endotrophic tadpoles: Systematic implications. Journal of Natural History 39: 1745-1758.
Kruger, D.J.D., C. Weldon, and L.H. Du Preez. 2011. Resolving the confusion: Amietia vertebralis and A. umbraculata tadpole morphology. African Zoology 46: 309-319.
Lardner, B. 2000. Morphological and life history responses to predators in larvae of seven anurans. Oikos 88: 169-180.
Lawler, S.P. 1989. Behavioral responses to predators and predation risk in four species of larval anurans. Animal Behavior 38: 1039-1047.
Lehr, E., L. Trueb, P.J. Venegas, and E. Arbeláez. 2007. Descriptions of the tadpoles of two neotropical Microhylid frogs, Melanophryne carpish and Nelsonophryne aequatorialis. Journal of Herpetology 41: 581-589.
Leong, T.M., C. Yeong, and R. Subaraj. 2009. Attempted predation on a tadpole by a painted bronzeback, Dendrelaphis pictus (Reptilia: Squamata: Colubridae). Nature in Singapore 2009 (2): 361-364.
Ma, X. and X. Lu. 2009. Sexual size dimorphism in relation to age and growth based on skeletochronological analysis in a Tibetan frog. Amphibia-Reptilia 30: 351-359.
Márquez, Rafael. 1996. Egg mass and size of tadpoles at hatching in the midwife toad Alytes obstetricans and Alytes cisternasii: Implications for female choice. Copeia 4: 824-831.
Matsui, M. and J. Nabhitabhata. 2006. A new species of Amolops from Thailand (Amphibia, Anura, Ranidae).Zoological Science 23: 727-732.
Matsui, T. and M. Matsui. 1990. A new brown frog (genus Rana) from Honshu, Japan. Herpetologica 46: 78-85.
McCranie, J.R. and L.D. Wilson. 2002. The amphibians of Honduras. Contributions to Herpetology 19: 1-625.
McDiarmid, R. W. and R. Altig. 1999. Tadpoles, the biology of anuran larvae. University of Chicago Press, Chicago.
Menin, M., A.P. Lima, and D.J. Rodrigues. 2010. The tadpole of Leptodactylus pentadactylus (Anura: Leptodactylidae) from Central Amazonia. Zootaxa 2508: 65-68.
Menin, M., D.J. Rodrigues, and A.P. Lima. 2007. Clutches, tadpoles and advertisement calls of Synapturanus mirandaribeiroi and S. cf. salseri in Central Amazonia, Brazil. Herpetological Journal 17: 86-91.
Moran, N.A. 1994. Adaptation and constraint in the complex life cycles of animals. Annu. Rev. Ecol. Syst. 25:573–600.
Morrison, C. and J. Hero. 2003. Altitudinal growth and development rates of tadpoles of Litoria chloris and Litoria pearsoniana in Southeast Queensland, Australia. Journal of Herpetology 37: 59-64.
Newman, R.A. and A.E. Dunham. 1994. Size at metamorphosis and water loss in a desert anuran (Scaphiopus couchii). Copeia 2: 372-381.
Odendaal, F.J., C.M. Bull, and S.J. Richards. 1984. Interactions during feeding between tadpoles of Ranidella signifera and R. riparia. Journal of Herpetology 18: 489-492.
Orton, G. 1943. The tadpole of Rhinophrynus dorsalis. Occasional Papers of the Museum of Zoology – University of Michigan 472: 1-9.
Orton, G.L. 1951. The tadpole of Leptodactylus melanonotus (Hallowell). Copeia 1: 62-66.
Parichy, D.M. and R.H. Kaplan. 1991. Maternal effects on offpring growth and development depend on environmental quality in the frog Bombina orientalis. Oecologia 91: 579-586.
Pearl, C.A. and M.P. Hayes. 2002. Predation by Oregon spotted frogs (Rana pretiosa) on western toads (Bufo boreas) in Oregon. American Midland Naturalist 147: 145-152.
Pfennig, D.H. and P.J. Murphy. 2003. A test of alternative hypotheses for character divergence between coexisting species. Ecology 84: 1288-1297.
Pickersgill, M. 2005. The taxonomy and ethology of the Afrixalus stuhlmanni complex (Anura: Hyperoliidae). Steenstrupia 29: 1-38.
Pimenta, B.V.S. and C. Canedo. 2007. Description of the tadpole of Itapotihyla langsdorffi (Anura: Hylidae). Zootaxa 1387: 39-46.
Poelman, E.H., J.C. Verkade, R.P.A. Wijngaarden, and C. Felix-Novoa. Descriptions of the tadpoles of two poison frogs, Ameerega parvula and Ameerega bilinguis (Anura: Dendrobatidae) from Ecuador. Journal of Herpetology 44: 409-417.
Pombal, JP. And C.F.B. Haddad. 1999. Frogs of the genus Paratelmatobius (Anura: Leptodactylidae) with descriptions of two new species. Copeia 1999 (4): 1014-1026.
Randrianiaina, R., F. Glaw, M. Thomas, J. Glos, N. Raminosoa, and M. Vences. 2007. Descriptions of the tadpoles of two species of Gephyromantis, with a discussion of the phylogenetic origin of direct development in mantellid frogs. Zootaxa 1401: 53-61.
Rödel, M. O. (2000). Herpetofauna of West Africa, Vol. I. Amphibians of the West African Savanna. Edition Chimaira, Frankfurt, Germany.
Rödel, M, J. Kosuch, M. Veith, and R. Ernst. 2003. First record of the genus Acanthixalus Laurent, 1944 from the Upper Guinean Rain Forest, West Africa, with a description of a new species. Journal of Herpetology 37: 43-52.
Rodrigues, D.J., M. Menin, and A.P. Lima. 2007. Redescription of the tadpole of Leptodactylus rhodomystax (Anura: Leptodactylidae) with natural history notes. Zootaxa 1509: 61-67.
Rodríguez, L.O. and W.E. Duellman. 1994. Guide to the frogs of the Iquitos Region, Amazonian Peru. Special Publication of The University of Kansas Natural History Museum 22: 1-105.
Sabater-Pi, J. 1985. Contribution to the biology of the giant frog (Conraua goliath, Boulenger). Amphibia-Reptilia 6: 143-153.
Savage, J.M. 1968. The Dendrobatid frogs of Central America. Copeia 4: 745-776.
Savage, J.M. 2002. The Amphibians and Reptiles of Costa Rica: A Herpetofauna between Two Continents, between Two Seas. University of Chicago Press, Chicago, IL.
Schiesari, L.C. and G. Moreira. 1996. The tadpole of Phrynohyas coriacea (Hylidae) with comments on the species’ reproduction. Journal of Herpetology 30: 404-407.
Schijfsma, K. 1932. Notes on some tadpoles, toads and frogs from Java. Teubia 14: 43-72.
Schiøtz, A. (1999). Treefrogs of Africa. Chimaira Buchhandelsgesellscaft, Warlich Druck, Meckenheim, Germany.
Skelly, D.K. 1995. A behavioral trade-off and its consequences for the distribution of Pseudacris treefrog larvae. Ecology 76: 150-164.
Smith, M.A. 1924. Descriptions of Indian and Indo-Chinese tadpoles. Rec. Indian Mus. 26: 137-143.
Sokol, O.M. 1962. The tadpole of Hymenochirus boettgeri. Copeia 1962 (2): 272-284.
Sparling, D.W. and G.M. Fellers. 2009. Toxicity of two insecticides to California, USA, anurans and its relevance to declining amphibian populations.
Starrett, P. 1960. Descriptions of tadpoles of Middle American frogs. Miscellaneous Publications of the Museum of Zoology, University of Michigan 110: 1-37.
Stebbins, R.C. Western Reptiles and Amphibians. Third Edition. Houghton Mifflin Company, New York, NY.
Taylor, E.H. 1942. Tadpoles of Mexican Anura. Univ. Kansas Sci. Bull. 28 (3): 37-53.
Tejedo, M. 1991. Effect of predation by two species of sympatric tadpoles on embryo survival in natterjack toads (Bufo calamita). Herpetologica 47: 322-327.
Tyler, M.J. and P. Doughty. 2009. Field guide to frogs of Western Australia. Fourth Edition. Western Australian Museum, Perth, Australia.
Veeranagoudar, D.K., R.S. Raddar, B.A. Shanbhag, and S.R. Saidapur. 2009. Jumping behavior of semiterrestrial tadpoles of Indirana beddomii (Gunth.): relative importance of tail and body size. Journal of Herpetology 43: 680-684.
Vejarano, S., M. Thomas, and M. Vences. 2006. Comparative larval morphology in Madagascan frogs of the genus Guibemantis (Amphibia: Mantellidae). Zootaxa 1329: 39-57.
Vences, M., A. Kupfer, G.A. Llorente, A. Montori, and M.A. Carretero. 1993. Description of the larval stages of the Pyrenean frog, Rana pyrenaica Serra-Cobo, 1993 (Amphibia: Ranidae). Bollettino del Museo Regionale di Sciencze Naturali 15: 1-23.
Vences, M., M. Puente, S. Nieto, D.R. Vieites. 2002. Phenotypic plasticity of anuran larvae: environmental variables influence body shape and oral morphology in Rana temporaria tadpoles. Journal of Zoology 257: 155-162.
Vera Candioti, M.F., C. Ubeda, and E.O. Lavilla. 2005. Morphology and metamorphosis of Eupsophus calcaratus tadpoles (Anura: Leptodactylidae). Journal of Morphology 262: 161-177.
Volpe, E.P., M.A. Wilkens, and J.L. Dobie. 1961. Embryonic and larval development of Hyla avivoca. Copeia 1961: 340-349.
Warkentin, K.M. 1999. Effects of hatchling age on development and hatchling morphology in the red-eyed treefrog, Agalychnis callidryas. Biological Journal of the Linnean Society 68: 443-470.
Wassersug, R.J. and W.R. Heyer. 1988. A survey of internal oral features of leptodactyloid larvae (Amphibia: Anura). Smithonian Contributions to Zoology 457: 1-99.
Werner, E.E. 1994. Ontogenetic scaling of competitive relations: size-dependent effects and responses in two anuran larvae. Ecology 75: 197-213.
Werner, J.K., B.A. Maxwell, P. Hendricks, and D.L. Flath. 2004. Amphibians and reptiles of Montana. Mountain Press Publishing Company, Missoula, MT.
Wright, A.H. 1929. Synopsis and description of North American tadpoles. Proceedings of the US National Museum 74: 1-70.
Wright, A.H. and A.A. Wright. 1949. Handbook of Frogs and Toads of the United States and Canada. Third edition. Comstock Publishing Associates, Ithaca, New York.
Wu, C. and Y. Kam. 2005. Thermal tolerance and thermoregulation by Taiwanese Rhacophorid tadpoles (Buergeria japonica) living in geothermal hot springs and streams. Herpetologica 61: 35-46.
Yamashita, M., T. Naitoh, and R.J. Wassersug. 2000. Startle response and turning bias in Microhyla tadpoles. Zoological Science 17: 185-189.
